# Supplementary material for: Quorum sensing signals from sludge improving the self-assembly of electrode biofilms in microbial fuel cells for chloramphenicol degradation
Source: Royal Society of Chemistry journal article supplement (doi:10.1039/d2ew00363e), 2022-01-01
Supplement: d2ew00363e1.pdf [file d2ew00363e1.pdf]

## Supporting Information

# Quorum sensing signals from sludge improving self-assembly of electrode biofilms in microbial fuel cells for chloramphenicol degradation

Xiayuan Wu<sup>a</sup> · Xinglei Zhuang<sup>a</sup> · Zuopeng Lv<sup>b</sup> · Fengxue Xin<sup>a</sup> · Weiliang Dong<sup>a</sup> ·

Yan Li<sup>a</sup> · Honghua Jia<sup>a,\*</sup>

<sup>a</sup>College of Biotechnology and Pharmaceutical Engineering, Nanjing Tech University,  
Nanjing 211816, China

<sup>b</sup>The Key Laboratory of Biotechnology for Medicinal Plants of Jiangsu Province,  
Jiangsu Normal University, Xuzhou 221116, China

### \*Corresponding author:

Honghua Jia

Nanjing Tech University, No.30 Puzhu Road(S), Nanjing, 211816, Jiangsu, P.R.  
China

**Tel./Fax:** +86 25 58139929

**E-mail:** hhjia@njtech.edu.cn

FIGURES (5)

TABLES (3)

PAGES (9)

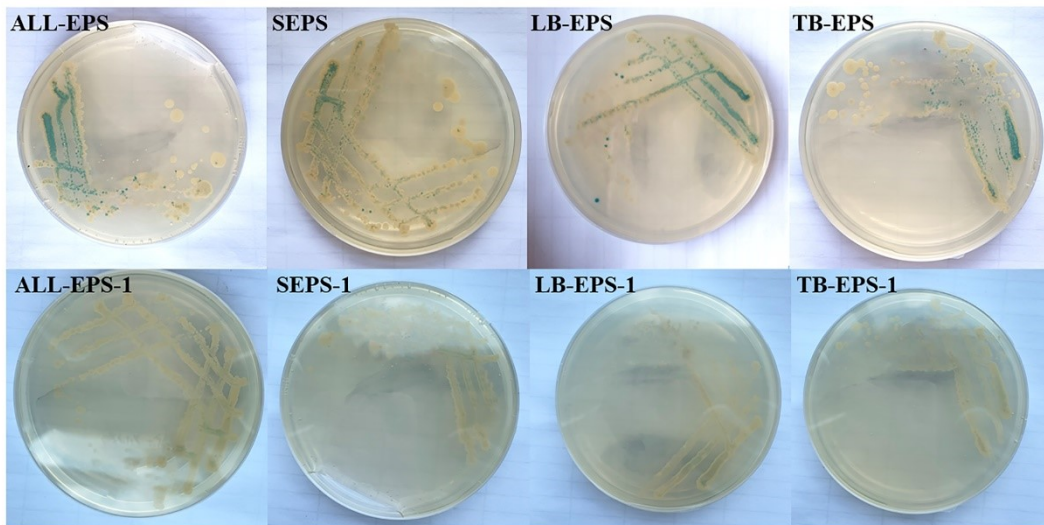

**Fig. S1.** Agar plate-based bioassay for AHL preliminary detection in different EPS.

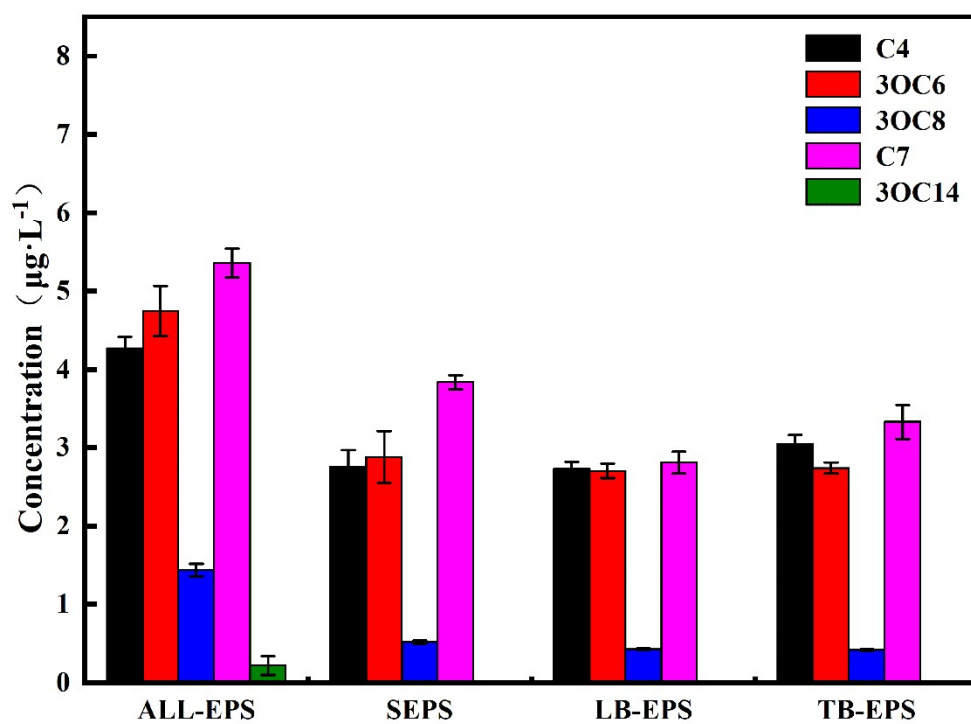

**Fig. S2.** The UPLC-MS/MS analysis for AHL identification in different EPS.

**Table S1** The maximum voltages and power densities in different MFCs during the 6<sup>th</sup> (18 d) and 9<sup>th</sup> (27 d) cycles; different lowercase letters indicate the values have significant differences ( $P < 0.05$ ).

| <b>MFC group</b> | <b>V<sub>max</sub> (mV)</b> | <b>P<sub>max</sub> (mW/m<sup>2</sup>)</b> |
|------------------|-----------------------------|-------------------------------------------|
| ALL-EPS/18 d     | 633.55 a                    | 414.00 b                                  |
| SEPS/18 d        | 643.45 a                    | 385.70 c                                  |
| LB-EPS/18 d      | 607.52 b                    | 379.50 d                                  |
| TB-EPS/18 d      | 633.59 a                    | 538.14 a                                  |
| ALL-EPS-1/18 d   | 485.45 c                    | 168.39 e                                  |
| SEPS-1/18 d      | 101.20 e                    | 162.77 f                                  |
| LB-EPS-1/18 d    | 102.86 e                    | 135.88 h                                  |
| TB-EPS-1/18 d    | 196.36 d                    | 148.71 g                                  |
| ALL-EPS/27 d     | 677.75 b                    | 260.98 b                                  |
| SEPS/27 d        | 659.71 d                    | 214.94 c                                  |
| LB-EPS/27 d      | 667.01 c                    | 182.25 d                                  |
| TB-EPS/27 d      | 713.07 a                    | 498.17 a                                  |
| ALL-EPS-1/27 d   | 354.88 f                    | 167.74 f                                  |
| SEPS-1/27 d      | 209.59 h                    | 133.21 h                                  |
| LB-EPS-1/27 d    | 350.10 g                    | 139.62 g                                  |
| TB-EPS-1/27 d    | 471.49 e                    | 174.55 e                                  |

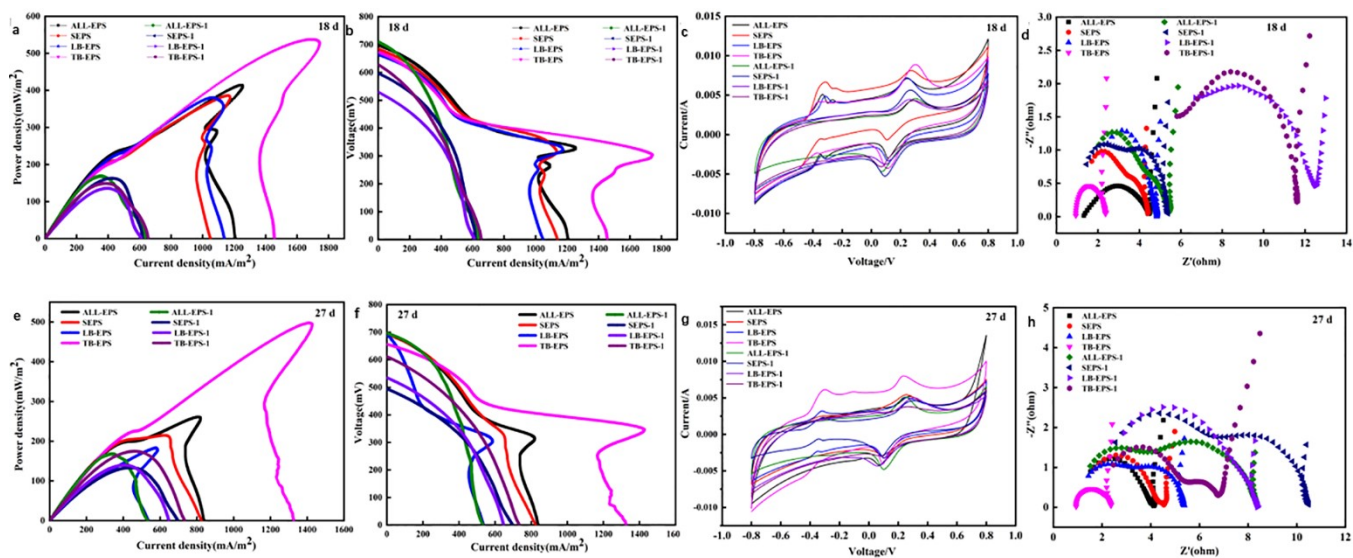

**Fig. S3.** The power density (a, e) and polarization (b, f), cyclic voltammogram (c, g), and electrochemical impedance spectroscopy (d, h) curves of different MFCs at different acclimation times (18 and 27 d).

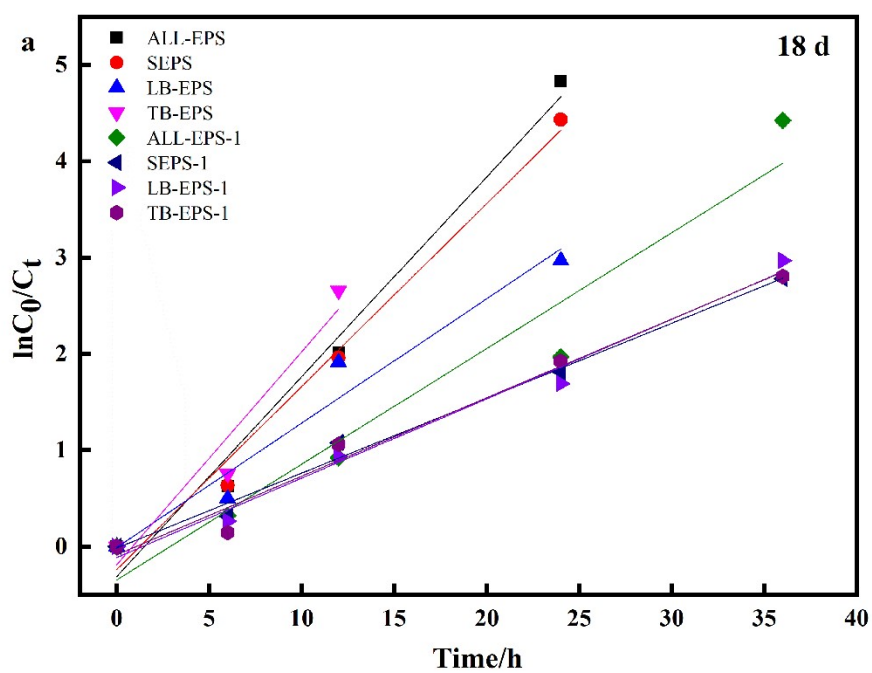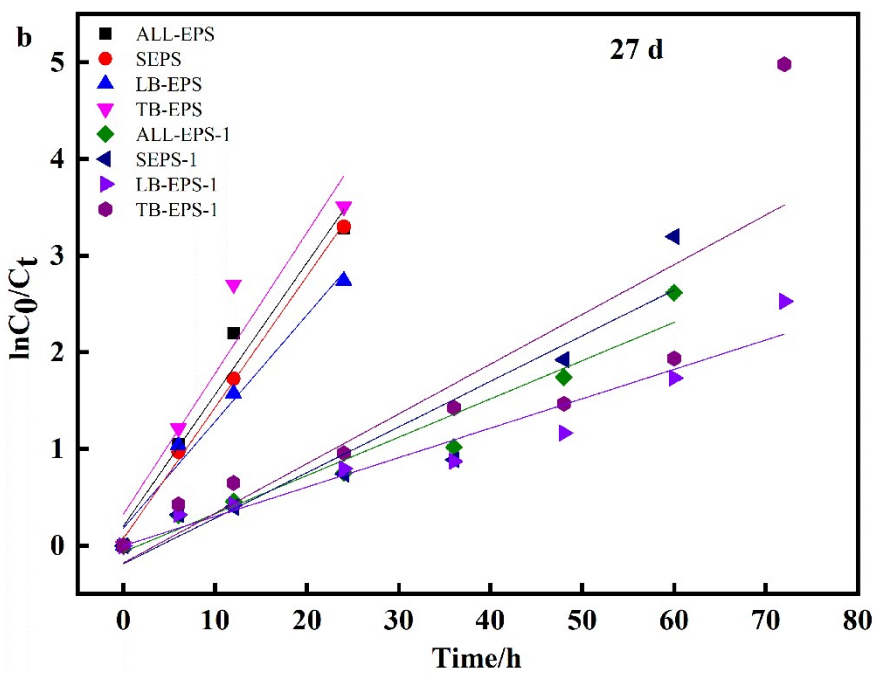

**Fig. S4.** The degradation kinetics of CAP in different MFCs during the 6th (a: 18 d) and 9th (b: 27 d) cycles.

**Table S2** The CAP removal kinetics in different MFCs during the 6<sup>th</sup> (18 d) and 9<sup>th</sup> (27 d) cycles.

| <b>MFC group</b> | <b>Fitting equation</b> | <b>K (h<sup>-1</sup>)</b> | <b>Half-life time (h)</b> | <b>R<sup>2</sup></b> |
|------------------|-------------------------|---------------------------|---------------------------|----------------------|
| ALL-EPS/18 d     | $\ln C_0/C_t = 0.21t$   | 0.21                      | 4.76                      | 0.99                 |
| SEPS/18 d        | $\ln C_0/C_t = 0.19t$   | 0.19                      | 5.26                      | 0.99                 |
| LB-EPS/18 d      | $\ln C_0/C_t = 0.13t$   | 0.13                      | 7.69                      | 0.98                 |
| TB-EPS/18 d      | $\ln C_0/C_t = 0.22t$   | 0.22                      | 4.55                      | 0.97                 |
| ALL-EPS-1/18 d   | $\ln C_0/C_t = 0.12t$   | 0.12                      | 8.33                      | 0.97                 |
| SEPS-1/18 d      | $\ln C_0/C_t = 0.08t$   | 0.08                      | 12.50                     | 0.99                 |
| LB-EPS-1/18 d    | $\ln C_0/C_t = 0.08t$   | 0.08                      | 12.50                     | 0.99                 |
| TB-EPS-1/18 d    | $\ln C_0/C_t = 0.08t$   | 0.08                      | 12.50                     | 0.89                 |
| ALL-EPS/27 d     | $\ln C_0/C_t = 0.15t$   | 0.15                      | 6.67                      | 0.98                 |
| SEPS/27 d        | $\ln C_0/C_t = 0.14t$   | 0.14                      | 7.14                      | 0.98                 |
| LB-EPS/27 d      | $\ln C_0/C_t = 0.11t$   | 0.11                      | 9.09                      | 0.99                 |
| TB-EPS/27 d      | $\ln C_0/C_t = 0.16t$   | 0.16                      | 6.25                      | 0.96                 |
| ALL-EPS-1/27 d   | $\ln C_0/C_t = 0.04t$   | 0.04                      | 25.00                     | 0.95                 |
| SEPS-1/27 d      | $\ln C_0/C_t = 0.05t$   | 0.05                      | 20.00                     | 0.94                 |
| LB-EPS-1/27 d    | $\ln C_0/C_t = 0.03t$   | 0.03                      | 33.33                     | 0.96                 |
| TB-EPS-1/27 d    | $\ln C_0/C_t = 0.06t$   | 0.06                      | 16.67                     | 0.90                 |

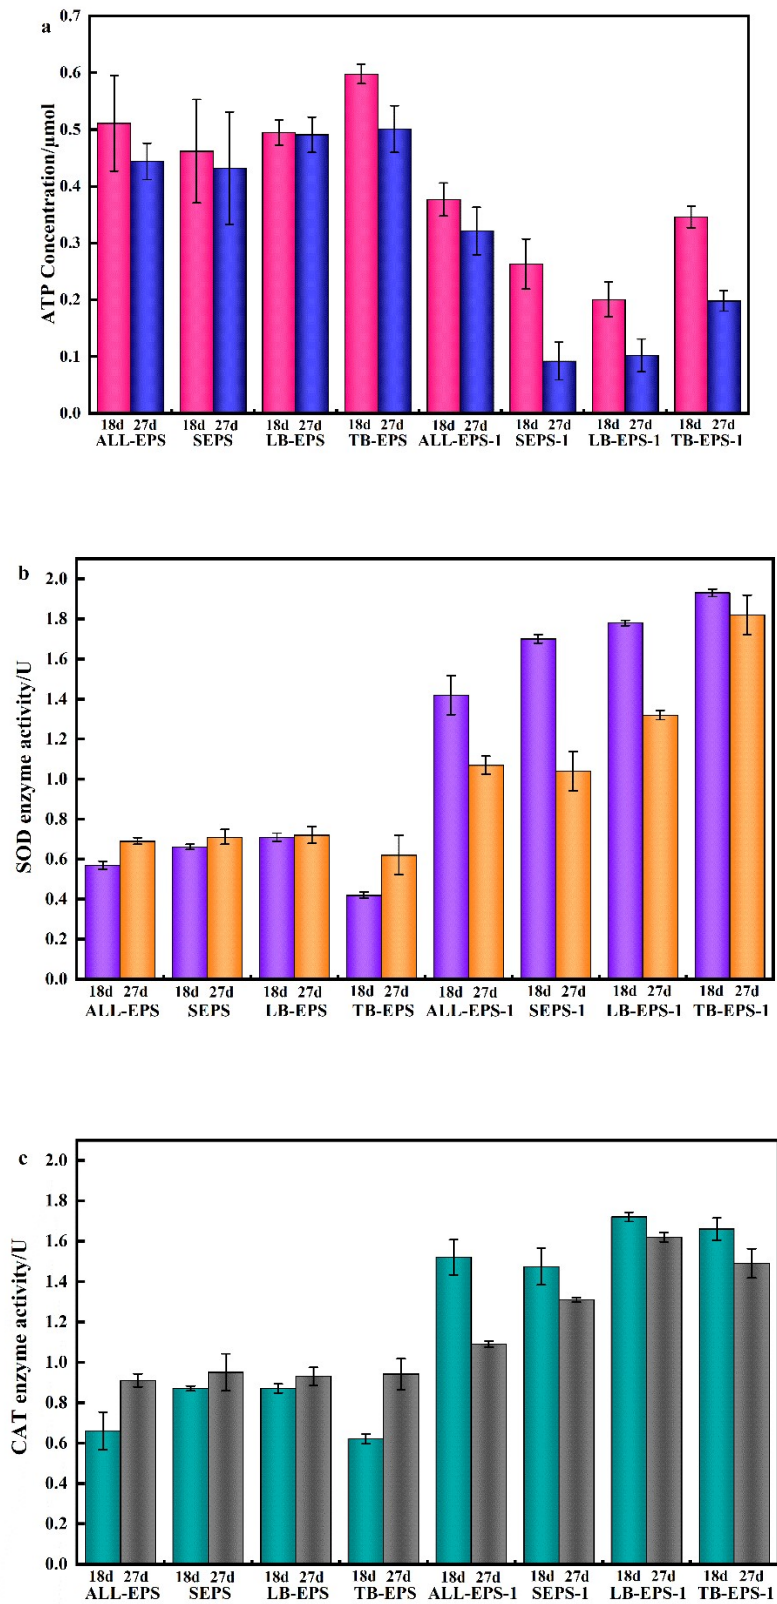

**Fig. S5.** The ATP concentrations (a), superoxide dismutase (b) and catalase (c) activities of different anode biofilms at different acclimation times.



**Table S3** The  $\alpha$ -diversity indices of microbial community in different anode biofilms.

| <b>Sample</b>  | <b>OTU</b> | <b>ACE</b> | <b>Chao1</b> | <b>Shannon</b> | <b>Simpson</b> |
|----------------|------------|------------|--------------|----------------|----------------|
| ALL-EPS/18 d   | 601        | 666        | 677          | 4.67           | 0.0181         |
| SEPS/18 d      | 838        | 996        | 979          | 4.70           | 0.0220         |
| LB-EPS/18 d    | 657        | 724        | 732          | 4.66           | 0.0195         |
| TB-EPS/18 d    | 807        | 882        | 893          | 4.67           | 0.0204         |
| ALL-EPS-1/18 d | 483        | 653        | 647          | 3.39           | 0.0706         |
| SEPS-1/18 d    | 235        | 355        | 356          | 2.59           | 0.1198         |
| LB-EPS-1/18 d  | 276        | 449        | 368          | 2.85           | 0.1112         |
| TB-EPS-1/18 d  | 350        | 615        | 500          | 2.00           | 0.2928         |
| ALL-EPS/27 d   | 629        | 735        | 748          | 4.21           | 0.0379         |
| SEPS/27 d      | 710        | 793        | 806          | 4.46           | 0.0324         |
| LB-EPS/27 d    | 451        | 516        | 522          | 4.27           | 0.0290         |
| TB-EPS/27 d    | 500        | 550        | 550          | 3.82           | 0.0628         |
| ALL-EPS-1/27 d | 319        | 372        | 376          | 2.35           | 0.1776         |
| SEPS-1/27 d    | 551        | 712        | 681          | 3.05           | 0.1348         |
| LB-EPS-1/27 d  | 376        | 432        | 434          | 1.77           | 0.4322         |
| TB-EPS-1/27 d  | 462        | 605        | 560          | 2.55           | 0.2397         |
